# Supplementary material for: Prolonging somatic cell proliferation through constitutive hox gene expression in C. elegans
Source: Research Square preprint supplement (doi:10.21203/rs.3.rs-2921597/v1), 2023-05-18
Supplement: Supplementary file 4 [file eed7d5be6ac9d73eb4cc67ae.xlsx]

## Sheet: Sheet1
	Table S2. List of C. elegans strains used.
Strain	genotype
AH5100	lin-39(zh120); swIs79[ajm-1::gfp]; zh616.1[hs-16p::zif-1]
AH5101	lin-39(zh120); swIs79[ajm-1::gfp]; zh616.2[hs-16p::zif-1]
AH6145	zhIs167[egl-17p>lin-39::gfp]; he317[eft-3p>Lox2272-egl-13::nls::bfp2-Lox2272-egl-13::nls::mCherry]; heSi220[lin-31p>cre]
AH6139	zhIs167[egl-17p>lin-39::gfp]; heSi45[mcm-4::mCherry]
AH6331	zhEx670.1 [egl-17p>nls::gfp]; he317[eft-3p>Lox2272-egl-13::nls::bfp2-Lox2272-egl-13::nls::mCherry]; heSi220[lin-31p>cre]
AH6332	zhEx670.2 [egl-17p>nls::gfp]; he317[eft-3p>Lox2272-egl-13::nls::bfp2-Lox2272-egl-13::nls::mCherry]; heSi220[lin-31p>cre]
AH6333	zhEx670.3 [egl-17p>nls::gfp]; he317[eft-3p>Lox2272-egl-13::nls::bfp2-Lox2272-egl-13::nls::mCherry]; heSi220[lin-31p>cre]
AH5949	zhEx670.1[egl-17p>nls::gfp]; heSi45[mcm-4::mCherry]
AH5950	zhEx670.2[egl-17p>nls::gfp]; heSi45[mcm-4::mCherry]
AH5219	zhEx630.1[egl-17p>lin-39::gfp]
AH5545	zhEx630.2[egl-17p>lin-39::gfp]
AH5546	zhEx630.3[egl-17p>lin-39::gfp]
AH5604	zhEx641.1 [egl-17p>lin-39cDNA::gfp]
AH5586	zhEx641.2 [egl-17p>lin-39cDNA::gfp]
AH5676	zhEx642.1[egl-17p>lin-39cDNA+intron1::gfp]
AH5677	zhEx642.2[egl-17p>lin-39cDNA+intron1::gfp]
AH5678	zhEx642.3[egl-17p>lin-39cDNA+intron1::gfp]
AH6103	zhEx678.1[pbx-hlh-8p>lin-39::mCherry]; ayIs7[hlh-8p>gfp]
AH6104	zhEx678.2[pbx-hlh-8p>lin-39::mCherry]; ayIs7[hlh-8p>gfp]
AH6054	zhEx690.1[pbx-hlh-8p>nls::mCherry]; ayIs7[hlh-8p>gfp]
AH6334	zhEx690.2[pbx-hlh-8p>nls::mCherry]; ayIs7[hlh-8p>gfp]
AH5764	zhEx650.1[pbx-ACELp>lin-39::gfp]; qyIs23[chd-3p>PH::mCherry]; qyIs10[lam-1:: gfp]
AH6773	zhEx650.2[pbx-ACELp>lin-39::gfp]; qyIs23[chd-3p>PH::mCherry]; qyIs10[lam-1:: gfp]
AH5920	zhEx666.1[pbx-ACELp>nls::gfp]; qyIs23[chd-3p>PH::mCherry]; qyIs10[lam-1:: gfp]
AH5921	zhEx666.2[pbx-ACELp>nls::gfp]; qyIs23[chd-3p>PH::mCherry]; qyIs10[lam-1:: gfp]
AH5881	zhEx662.1[pbx-ACELp>ceh-13::gfp]; qyIs23[chd-3p>PH::mCherry]; qyIs10[lam-1:: gfp]
AH5882	zhEx662.2[pbx-ACELp>ceh-13::gfp]; qyIs23[chd-3p>PH::mCherry]; qyIs10[lam-1:: gfp]
AH5878	zhEx660.1[pbx-ACELp>mab-5::gfp]; qyIs23[chd-3p>PH::mCherry]; qyIs10[lam-1:: gfp]
AH5887	zhEx660.2[pbx-ACELp>mab-5::gfp]; qyIs23[chd-3p>PH::mCherry]; qyIs10[lam-1:: gfp]
AH5879	zhEx661.1[pbx-ACELp>egl-5::gfp]; qyIs23[chd-3p>PH::mCherry]; qyIs10[lam-1:: gfp]
AH5880	zhEx661.2[pbx-ACELp>egl-5::gfp]; qyIs23[chd-3p>PH::mCherry]; qyIs10[lam-1:: gfp]
AH5910	zhEx689.1 [pbx-ACELp>lin-39::mCherry]; wgIs72 [lin-12:: gfp]
AH5912	zhEx689.2 [pbx-ACELp>lin-39::mCherry]; wgIs72 [lin-12:: gfp]
AH5706	qyIs23[chd-3p>PH::mCherry]; wgIs72 [lin-12:: gfp]
AH5942	zhEx689.1 [pbx-ACELp>lin-39::mCherry]; zhIs80 [cye-1::gfp]
AH5943	zhEx689.2 [pbx-ACELp>lin-39::mCherry]; zhIs80 [cye-1::gfp]
AH5940	qyIs23[chd-3p>PH::mCherry]; zhIs80 [cye-1::gfp]
AH5883	zhIs150[pbx-ACELp>lin-39::gfp]; qyIs23[chd-3p>PH::mCherry]; qyIs10[lam-1:: gfp]
AH5889	zhEx689.1 [pbx-ACELp>lin-39::mCherry]; qIs56[lag-2>gfp]
AH5913	zhEx689.2 [pbx-ACELp>lin-39::mCherry]; qIs56[lag-2>gfp]
AH5705	qyIs23[chd-3p>PH::mCherry]; qIs56[lag-2>gfp]
AH6121	zhIs165[pbx-ACELp>nls::gfp]; qyIs23[chd-3p>PH::mCherry]; qyIs10[lam-1:: gfp]
AH5963	zhIs150[pbx-ACELp>lin-39::gfp]; heSi45[mcm-4::mCherry]
AH6152	zhIs165[pbx-ACELp>nls::gfp]; heSi45[mcm-4::mCherry]
AH6146	zhIs150[pbx-ACELp>lin-39::gfp] ; fem-2(b245ts)
AH6150	zhIs150[pbx-ACELp>lin-39::gfp] ; aff-1(tm2214); fem-2(b245ts)
AH6152	zhIs165[pbx-ACELp>nls::gfp] ; fem-2(b245ts)
AH6175	zhIs165[pbx-ACELp>nls::gfp] ; aff-1(tm2214); fem-2(b245ts)
